# Supplementary material for: Machine learning approaches to drug response prediction: challenges and recent progress
Source: PubMed Central journal article supplement (PMC7296033; doi:10.1038/s41698-020-0122-1), 2020-06-15
Supplement: 41698_2020_122_MOESM1_ESM.pdf [file 41698_2020_122_MOESM1_ESM.pdf]

Supplementary Table S1. List of publicly available clinical trial studies.

| Study              | # Patients | Tissues          | Molecular profiling            | Drugs                                                                         | Source                                                                                                                                |
|--------------------|------------|------------------|--------------------------------|-------------------------------------------------------------------------------|---------------------------------------------------------------------------------------------------------------------------------------|
| NEOALTTO           | 89         | Breast (HER2+)   | WXS; RNA-seq                   | Lapatinib                                                                     | NCT00553358                                                                                                                           |
| NEOALTTO           | 79         | Breast (HER2+)   | WXS; RNA-seq                   | Trastuzumab                                                                   | NCT00553358                                                                                                                           |
| NEOALTTO           | 86         | Breast (HER2+)   | WXS; RNA-seq                   | Lapatinib + Trastuzumab                                                       | NCT00553358                                                                                                                           |
| Bortezomib_Myeloma | 169        | Purified myeloma | microarray (Affymetrix 133A/B) | bortezomib                                                                    | <a href="https://www.ncbi.nlm.nih.gov/geo/query/acc.cgi?acc=GSE9782">https://www.ncbi.nlm.nih.gov/geo/query/acc.cgi?acc=GSE9782</a>   |
| Epirubicin_ER-     | 118        | Breast (ER-)     | HG-U133_Plus_2                 | epirubicin                                                                    | <a href="https://www.ncbi.nlm.nih.gov/geo/query/acc.cgi?acc=GSE16446">https://www.ncbi.nlm.nih.gov/geo/query/acc.cgi?acc=GSE16446</a> |
| Breast_Neo adj     | 506        | Breast           | HG-U133A                       | neoadjuvant taxane-anthracycline chemotherapy                                 | <a href="https://www.ncbi.nlm.nih.gov/geo/query/acc.cgi?acc=GSE25066">https://www.ncbi.nlm.nih.gov/geo/query/acc.cgi?acc=GSE25066</a> |
| TransNOAH          | Total 156  | Breast (HER2+)   | HG-U133_Plus_2                 | trastuzumab                                                                   | <a href="https://www.ncbi.nlm.nih.gov/geo/query/acc.cgi?acc=GSE50948">https://www.ncbi.nlm.nih.gov/geo/query/acc.cgi?acc=GSE50948</a> |
| TransNOAH          | Total 156  | Breast (HER2+)   | HG-U133_Plus_2                 | trastuzumab+neoadjuvant chemo                                                 | <a href="https://www.ncbi.nlm.nih.gov/geo/query/acc.cgi?acc=GSE50948">https://www.ncbi.nlm.nih.gov/geo/query/acc.cgi?acc=GSE50948</a> |
| Breast_Neo adj2    | 115        | Breast           | HG-U133_Plus_2                 | neoadjuvant paclitaxel followed by 5-fluorouracil/epirubicin/cyclophosphamide | <a href="https://www.ncbi.nlm.nih.gov/geo/query/acc.cgi?acc=GSE32646">https://www.ncbi.nlm.nih.gov/geo/query/acc.cgi?acc=GSE32646</a> |
| Breast_Neo adj3    | 279        | Breast           | HG-U133A                       | Neoadjuvant chemotherapy                                                      | <a href="https://www.ncbi.nlm.nih.gov/geo/query/acc.cgi?acc=GSE41998">https://www.ncbi.nlm.nih.gov/geo/query/acc.cgi?acc=GSE41998</a> |
| Breast_Chemo       | 69         | Breast (TNBC)    | HG-U133A                       | chemotherapy                                                                  | <a href="https://www.ncbi.nlm.nih.gov/geo/query/acc.cgi?acc=GSE58479">https://www.ncbi.nlm.nih.gov/geo/query/acc.cgi?acc=GSE58479</a> |
| Breast_Neo adj5    | 278        | Breast           | HG-U133A                       | Neoadjuvant chemotherapy                                                      | <a href="https://www.ncbi.nlm.nih.gov/geo/query/acc.cgi?acc=GSE20194">https://www.ncbi.nlm.nih.gov/geo/query/acc.cgi?acc=GSE20194</a> |
| Breast_Chemo2      | Total 161  | Breast           | U133_X3P                       | (5-fluorouracil, cyclophosphamide, epirubicin)                                | <a href="https://www.ncbi.nlm.nih.gov/geo/query/acc.cgi?acc=GSE6861">https://www.ncbi.nlm.nih.gov/geo/query/acc.cgi?acc=GSE6861</a>   |
| Breast_Chemo2      | Total 161  | Breast           | U133_X3P                       | (epirubicin, docetaxel)                                                       | <a href="https://www.ncbi.nlm.nih.gov/geo/query/acc.cgi?acc=G">https://www.ncbi.nlm.nih.gov/geo/query/acc.cgi?acc=G</a>               |

|                      |          |        |                                                |                                           |                                                                                                                                       |
|----------------------|----------|--------|------------------------------------------------|-------------------------------------------|---------------------------------------------------------------------------------------------------------------------------------------|
|                      |          |        |                                                |                                           | <a href="#">SE6861</a>                                                                                                                |
| Breast_Che<br>mo3    | 178      | Breast | HG-U133A                                       | chemotherapy                              | <a href="https://www.ncbi.nlm.nih.gov/geo/query/acc.cgi?acc=GSE20271">https://www.ncbi.nlm.nih.gov/geo/query/acc.cgi?acc=GSE20271</a> |
| Breast_Gefit<br>inib | Total 96 | Breast | HG-<br>U133_Plus_2                             | Neoadjuvant anastrozole                   | <a href="https://www.ncbi.nlm.nih.gov/geo/query/acc.cgi?acc=GSE48906">https://www.ncbi.nlm.nih.gov/geo/query/acc.cgi?acc=GSE48906</a> |
| Breast_Gefit<br>inib | Total 96 | Breast | HG-<br>U133_Plus_2                             | Neoadjuvant<br>anastrozole+Gefitinib      | <a href="https://www.ncbi.nlm.nih.gov/geo/query/acc.cgi?acc=GSE48906">https://www.ncbi.nlm.nih.gov/geo/query/acc.cgi?acc=GSE48906</a> |
| Breast_Letr<br>ozole | 58       | Breast | HG-U133A<br>(before and<br>after<br>treatment) | letrozole                                 | <a href="https://www.ncbi.nlm.nih.gov/geo/query/acc.cgi?acc=GSE20181">https://www.ncbi.nlm.nih.gov/geo/query/acc.cgi?acc=GSE20181</a> |
| Breast_Che<br>mo4    | 52       | Breast | Expression<br>array                            | gemcitabine, epirubicine<br>and docetaxel | <a href="https://www.ncbi.nlm.nih.gov/geo/query/acc.cgi?acc=GSE4056">https://www.ncbi.nlm.nih.gov/geo/query/acc.cgi?acc=GSE4056</a>   |
